# Supplementary material
Source: Research Square preprint supplement (doi:10.21203/rs.3.rs-8729852/v1)
Supplement: Supplementary file 1 [file 4268817c0d288106b831ac37.docx]

**Thermodynamic, Electrostatic and Interaction Energy Insights into Reactive Dye Behavior in Aqueous/Non-aqueous Polyester/Cotton Dyeing Systems**

Danni Lua,b,c, Liujun Peia,b*, Jun Zhua,b, Wenhui Niua,b, Jifang Shend, Wenmiao Chend, Jiping Wanga,b,d

*a**Shanghai Engineering Research Center for Clean Production of Textile Chemistry;* *Shanghai University of Engineering Science, Shanghai 201620, PR, China*

*bSchool of Textiles and Fashion; Shanghai University of Engineering Science, Shanghai 201620, PR, China*

*cDepartment of Biological and Agricultural Engineering, University of California, Davis,California 95616, United States*

*d**Zhejiang Green Universe Technology Co., Ltd, Haining 314408, Zhejiang, PR, China*

**Experimental**

**Standard working curve**

**Fig. S1** The standard curves of three reactive dyes (a)C.I. Reactive red 19, (b)C.I. Reactive blue 19, (c)C.I. Reactive black 5

**Standard working curveInfluence of Thermodynamics on Reactive Dyeing in Different Media**


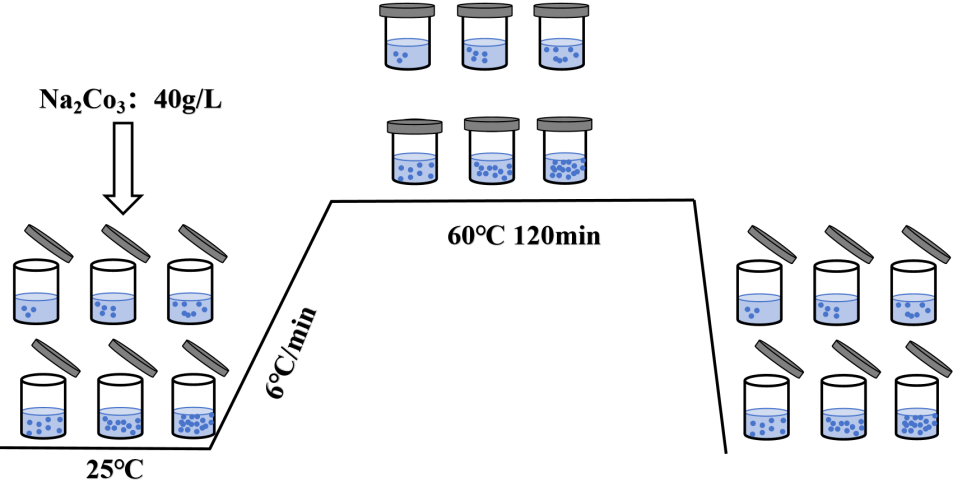


**Fig. S2** Preparation of hydrolyzed dye samples at different concentrations

**Fig. S3** Dyeing process for adsorption isotherm testing

## **Results and discussion**

**Ratio of Hydrolysed Dye to Reactive Dye on Fabric at Different Stages**

**Fig. S4** Chromatogram of C.I. Reactive blue 19 (a)Chromatograms of C.I. Reactive blue 19 unhydrolyzed for 60 min (R-60min), hydrolyzed for 5 min (H-5min), and hydrolyzed for 60 min (H-60min) (b)Chromatograms of rinsing residues collected after dyeing polyester and cotton fabrics with C.I. Reactive blue 19 (W denotes water bath; D5 denotes D5 system; D denotes the dyeing stage; F denotes the fixation stage; T denotes polyester; C denotes cotton)

**Fig. S5** Chromatogram of C.I. Reactive black 5 (a)Chromatograms of C.I. Reactive black 5 unhydrolyzed for 60 min (R-60min), hydrolyzed for 5 min (H-5min), and hydrolyzed for 60 min (H-60min) (b)Chromatograms of rinsing residues collected after dyeing polyester and cotton fabrics with C.I. Reactive black 5 (W denotes water bath; D5 denotes D5 system; D denotes the dyeing stage; F denotes the fixation stage; T denotes polyester; C denotes cotton)

**Thermodynamics of the Adsorption of C.I. Reactive blue 19 onto Polyester in Different Media**

**Fig. S6** Adsorption Nernst Isotherms of reactive blue 19 and hydrolyzed blue 19 on Polyester under different media conditions (a)Adsorption Nernst isotherm of reactive blue 19 in a water bath system, (b)Adsorption Nernst isotherm of hydrolyzed blue 19 in water bath system, (c)Adsorption Nernst isotherm of reactive blue 19 in D5 system, (d)Adsorption Nernst isotherm of hydrolyzed blue 19 in D5 system

**Fig. S7** Adsorption Langmuir Isotherms of reactive blue 19 and hydrolyzed blue 19 on Polyester under different media conditions (a)Adsorption Langmuir isotherm of reactive blue 19 in a water bath system, (b)Adsorption Langmuir isotherm of hydrolyzed blue 19 in water bath system, (c)Adsorption Langmuir isotherm of reactive blue 19 in D5 system, (d)Adsorption Langmuir isotherm of hydrolyzed blue 19 in D5 system

**Fig. S8** Adsorption Freundlich Isotherms of reactive blue 19 and hydrolyzed blue 19 on Polyester under different media conditions (a)Adsorption Freundlich isotherm of reactive blue 19 in a water bath system, (b)Adsorption Freundlich isotherm of hydrolyzed blue 19 in water bath system, (c)Adsorption Freundlich isotherm of reactive blue 19 in D5 system, (d)Adsorption Freundlich isotherm of hydrolyzed blue 19 in D5 system

**Spatial Conformation and Structure of Dye Molecules**

**Fig. S9** Spatial Structures of Dye Molecules (a)C.I. Reactive red 195, (b)C.I. Reactive blue 19, (c)C.I. Reactive black 5
